# Supplementary material for: A Semi-Automatic Iterative Method for Freeze-Thaw Landslide Identification in the Permafrost Region of the Qilian Mountains
Source: Copernicus journal article supplement (doi:10.5194/egusphere-2025-2726), 2025-07-01
Supplement: Supplementary file [file egusphere-2025-2726-AC1-supplement.pdf]

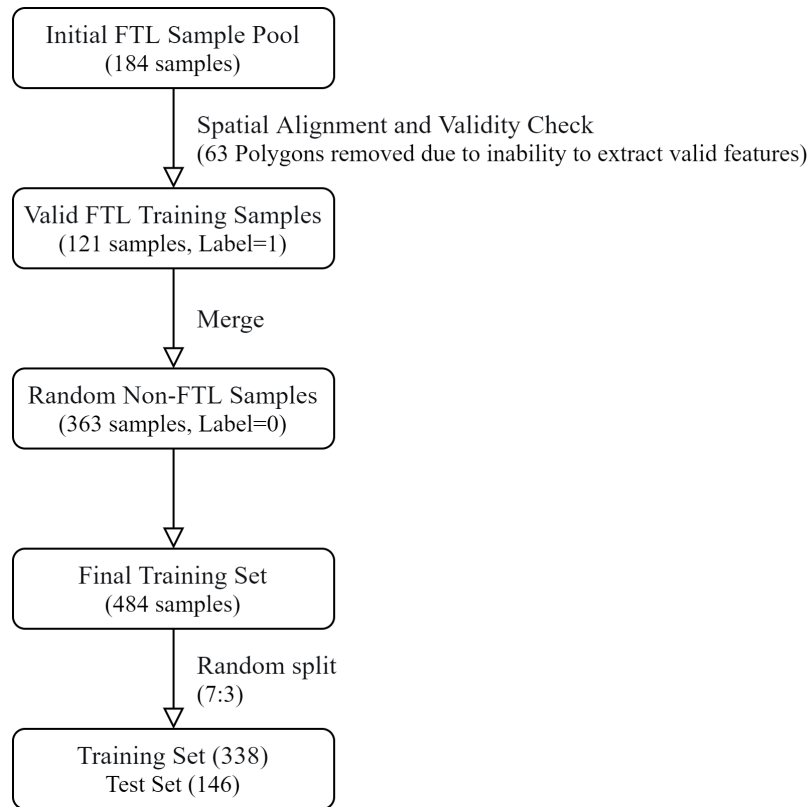

Figure S1. Flowchart of Machine Learning Training and Testing Dataset Construction

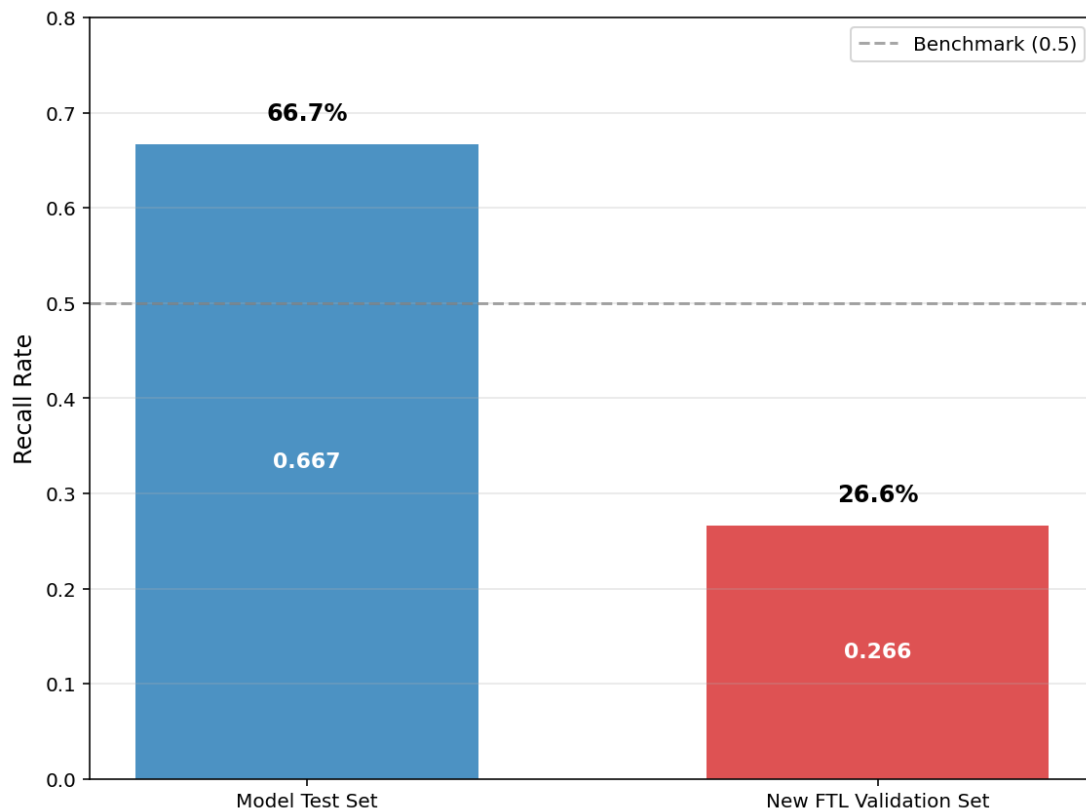

Figure S2. Comparison of Model Performance and Generalization Capability

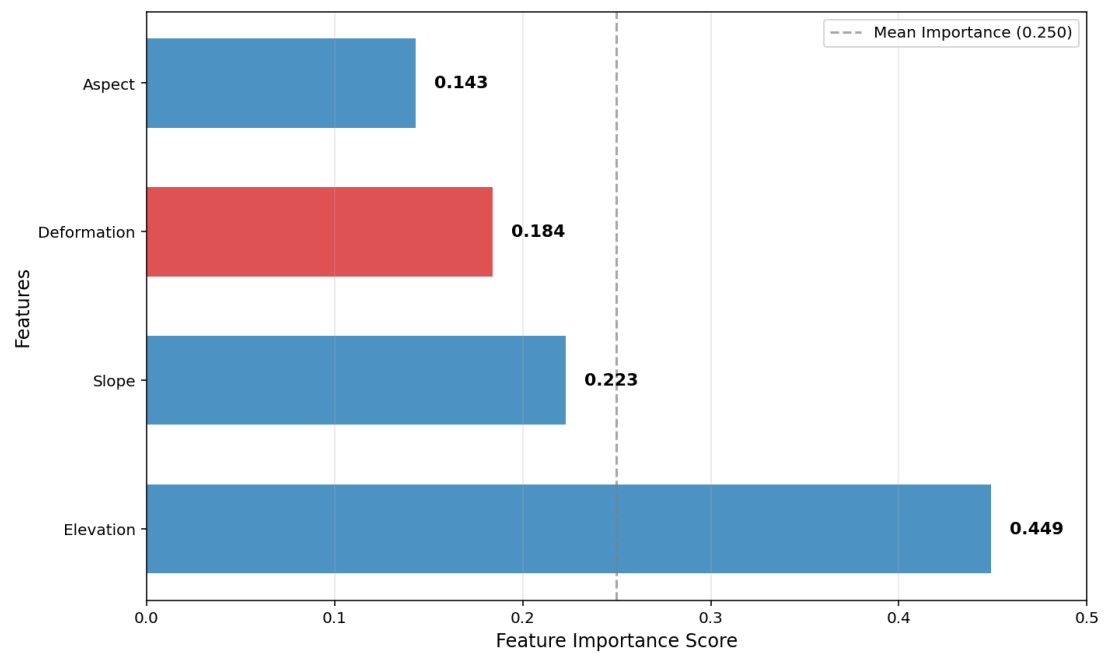

Figure S3. Feature Importance Ranking of the Trained Random Forest Model
