# Supplementary material for: A Semi-Automatic Iterative Method for Freeze-Thaw Landslide Identification in the Permafrost Region of the Qilian Mountains
Source: Copernicus journal article supplement (doi:10.5194/egusphere-2025-2726), 2025-07-01
Supplement: Supplementary file [file egusphere-2025-2726-AC2-supplement.pdf]

Lines 86-87:

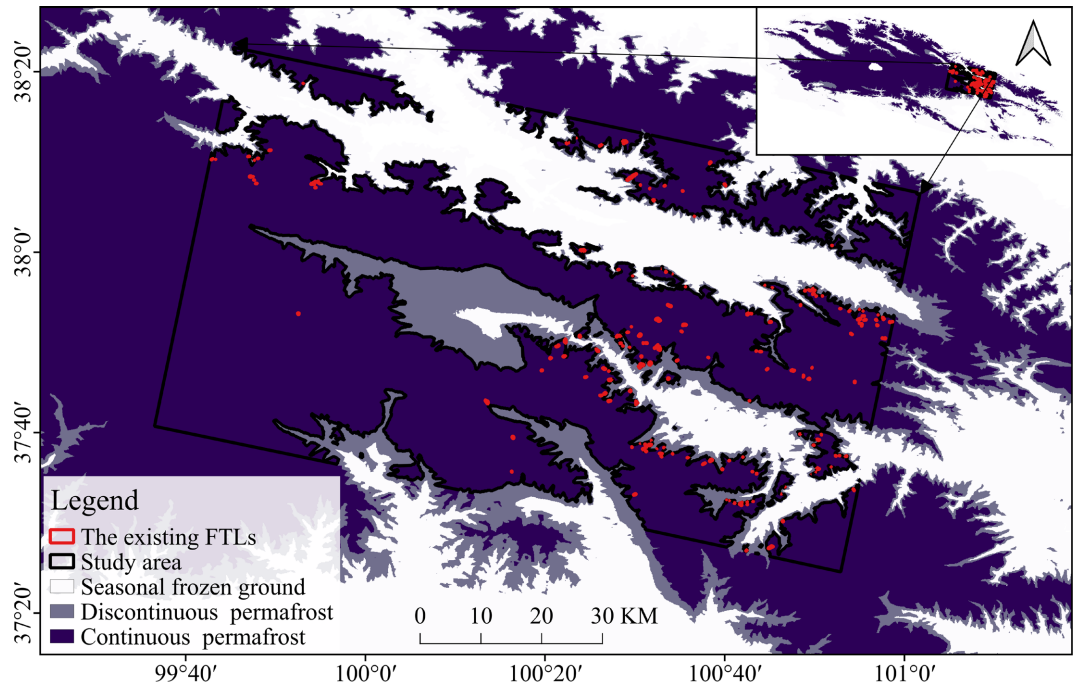

**Figure S1** The study area and the existing FTLs (red regions).

Lines 307-310:

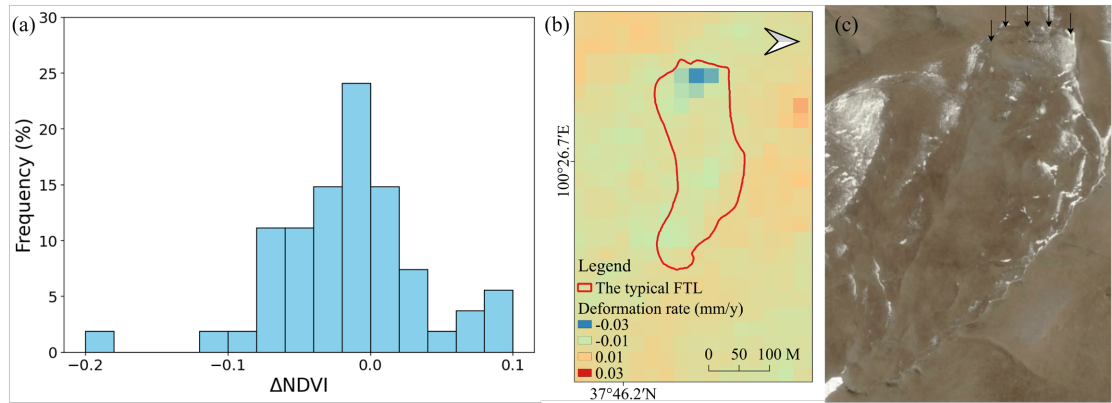

**Figure S8** Diagnostic characteristics of a typical small and hidden freeze-thaw landslide: (a) histogram of  $\Delta\text{NDVI}$  values within the FTL boundary; (b) surface deformation rate map with the FTL boundary marked by a red line; and (c) high-resolution optical image showing developing tension cracks at the landslide head (black arrows), corresponding to the area of maximum deformation in (b).

Lines 266-267:

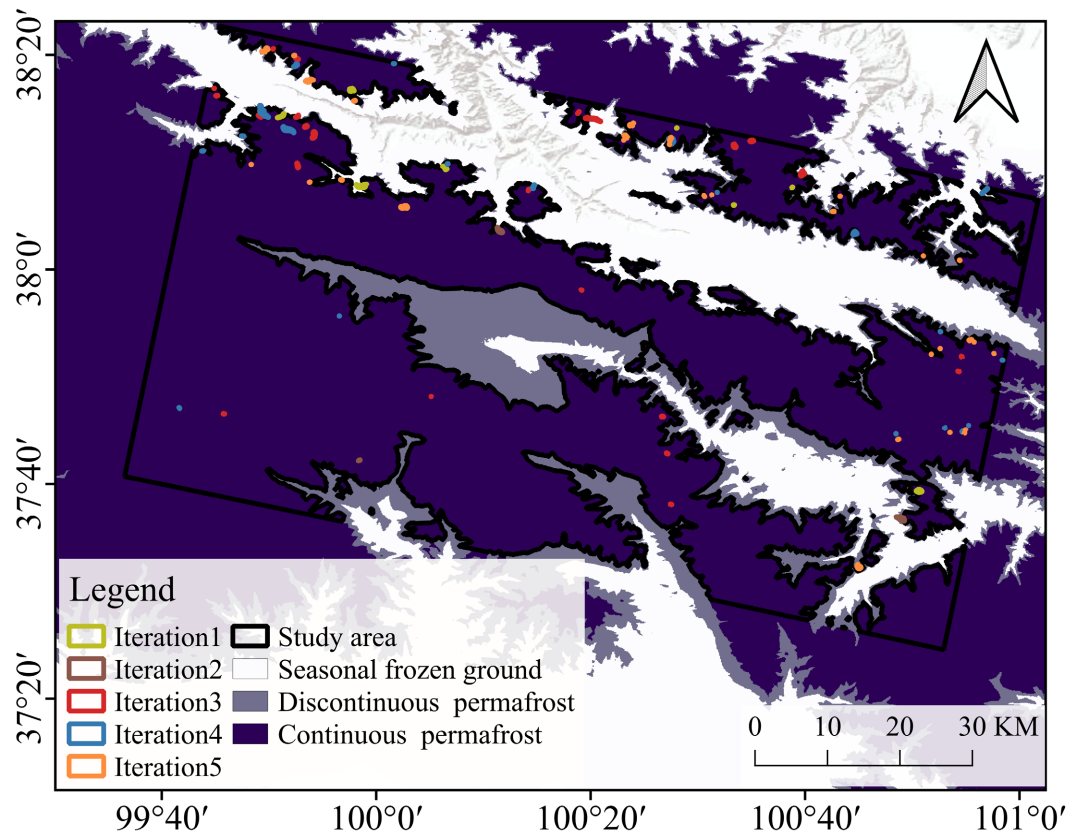

**Figure S3** The spatial distribution of new freeze-thaw landslide in each iteration.
